# Supplementary material for: Effect of Reinforcements and 3-D Printing Parameters on the Microstructure and Mechanical Properties of Acrylonitrile Butadiene Styrene (ABS) Polymer Composites
Source: MDPI journal article supplement (doi:10.3390/polym14102105), 2022-05-21
Supplement: s1 [file s1]

# Effect of Reinforcements and 3-D Printing Parameters on the Microstructure and Mechanical Properties of Acrylonitrile Butadiene Styrene (ABS) Polymer Composites

Ved S. Vakharia <sup>1</sup>, Mrityunjay Singh <sup>2,\*</sup>, Anton Salem <sup>3</sup>, Michael C. Halbig <sup>4,\*</sup> and Jonathan A. Salem <sup>4</sup>

<sup>1</sup> NASA Pathway Intern, Department of Mechanical and Aerospace Engineering, University of California, San Diego, La Jolla, CA 92092, USA; ved.vakharia@gmail.com

<sup>2</sup> Ohio Aerospace Institute, Cleveland, OH 44142, USA

<sup>3</sup> NASA Intern currently at VulcanForms, Inc., Burlington, MA 01803, USA; antonsalem1@gmail.com

<sup>4</sup> NASA Glenn Research Center, Cleveland, OH 44135, USA; jonathan.a.salem@nasa.gov

\* Correspondence: mrityunjaysingh@oai.org (M.S.); michael.c.halbig@nasa.gov (M.C.H.)

## Supplementary Materials

**Table S1.** Average Young's modulus and ultimate strength for each material and layer height.

| Material     | Layer Height (mm) | Young's Modulus (MPa) | Ultimate Strength (MPa) |
|--------------|-------------------|-----------------------|-------------------------|
| ABS w/CNT    | 0.2               | 2082                  | 34.2                    |
| ABS w/CNT    | 0.3               | 1901                  | 31.7                    |
| ABS w/CNT    | 0.4               | 1837                  | 28.7                    |
| Lab-made ABS | 0.2               | 1500                  | 23.5                    |
| Premium ABS  | 0.1               | 2084                  | 37.2                    |
| Premium ABS  | 0.2               | 1739                  | 28.8                    |
| Premium ABS  | 0.3               | 1724                  | 29.1                    |
| Premium ABS  | 0.4               | 1695                  | 27.6                    |
| ABS w/5%CF   | 0.1               | 2098                  | 29.6                    |
| ABS w/5%CF   | 0.2               | 1941                  | 27.3                    |
| ABS w/5%CF   | 0.3               | 1729                  | 23.7                    |
| ABS w/5%CF   | 0.4               | 1443                  | 20.6                    |
| Pure ABS     | 0.1               | 1826                  | 34.1                    |
| Pure ABS     | 0.2               | 1666                  | 29.8                    |
| Pure ABS     | 0.3               | 1622                  | 28.5                    |
| Pure ABS     | 0.4               | 1638                  | 27.3                    |

**Table S2.** Dimensions, Young's modulus, and ultimate strength for all test coupons.

| Material     | Specimen     | Layer Height (mm) | Width (in) | Thickness (in) | Area (in <sup>2</sup> ) | Young's Modulus (MPa) | Ultimate Strength (MPa) |
|--------------|--------------|-------------------|------------|----------------|-------------------------|-----------------------|-------------------------|
| ABS w/CNT    | 02_ABS-CNT_1 | 0.2               | 0.524      | 0.123          | 0.064                   | 2160.66               | 34.53                   |
| ABS w/CNT    | 02_ABS-CNT_2 | 0.2               | 0.528      | 0.124          | 0.065                   | 2059.62               | 34.01                   |
| ABS w/CNT    | 02_ABS-CNT_3 | 0.2               | 0.529      | 0.124          | 0.066                   | 2026.79               | 33.98                   |
| ABS w/CNT    | 03_ABS-CNT_1 | 0.3               | 0.530      | 0.131          | 0.069                   | 1892.67               | 31.11                   |
| ABS w/CNT    | 03_ABS-CNT_2 | 0.3               | 0.531      | 0.131          | 0.069                   | 1877.61               | 31.85                   |
| ABS w/CNT    | 03_ABS-CNT_3 | 0.3               | 0.527      | 0.130          | 0.069                   | 1931.64               | 32.09                   |
| ABS w/CNT    | 04_ABS-CNT_1 | 0.4               | 0.523      | 0.129          | 0.067                   | 1868.37               | 29.53                   |
| ABS w/CNT    | 04_ABS-CNT_2 | 0.4               | 0.531      | 0.133          | 0.071                   | 1768.47               | 28.01                   |
| ABS w/CNT    | 04_ABS-CNT_3 | 0.4               | 0.527      | 0.132          | 0.069                   | 1874.13               | 28.47                   |
| Lab-made ABS | 02_ABS-HM_1  | 0.2               | 0.520      | 0.113          | 0.059                   | 1503.34               | 23.86                   |
| Lab-made ABS | 02_ABS-HM_2  | 0.2               | 0.513      | 0.118          | 0.061                   | 1496.57               | 23.14                   |
| Premium ABS  | 01_ABS-P_1   | 0.1               | 0.531      | 0.128          | 0.068                   | 2085.79               | 36.85                   |
| Premium ABS  | 01_ABS-P_2   | 0.1               | 0.530      | 0.126          | 0.066                   | 2108.96               | 37.36                   |

|             |             |     |        |        |       |         |       |
|-------------|-------------|-----|--------|--------|-------|---------|-------|
| Premium ABS | 01_ABS-P_3  | 0.1 | 0.527  | 0.129  | 0.068 | 2058.40 | 37.43 |
| Premium ABS | 02_ABS-P_1  | 0.2 | 0.529  | 0.139  | 0.073 | 1716.34 | 28.64 |
| Premium ABS | 02_ABS-P_2  | 0.2 | 0.528  | 0.138  | 0.073 | 1752.64 | 28.47 |
| Premium ABS | 02_ABS-P_3  | 0.2 | 0.529  | 0.137  | 0.072 | 1749.30 | 29.14 |
| Premium ABS | 03_ABS-P_1  | 0.3 | 0.534  | 0.141  | 0.075 | 1715.71 | 28.90 |
| Premium ABS | 03_ABS-P_2  | 0.3 | 0.529  | 0.141  | 0.074 | 1721.32 | 29.13 |
| Premium ABS | 03_ABS-P_3  | 0.3 | 0.523  | 0.142  | 0.074 | 1735.86 | 29.18 |
| Premium ABS | 04_ABS-P_1  | 0.4 | 0.523  | 0.140  | 0.073 | 1716.05 | 27.62 |
| Premium ABS | 04_ABS-P_2  | 0.4 | 0.523  | 0.140  | 0.073 | 1704.58 | 27.87 |
| Premium ABS | 04_ABS-P_3  | 0.4 | 0.529  | 0.141  | 0.075 | 1663.00 | 27.20 |
| ABS w/5%CF  | 01_ABS-CF_1 | 0.1 | 0.5105 | 0.1205 | 0.062 | 2029.39 | 27.25 |
| ABS w/5%CF  | 01_ABS-CF_2 | 0.1 | 0.5125 | 0.116  | 0.059 | 2190.80 | 30.92 |
| ABS w/5%CF  | 01_ABS-CF_3 | 0.1 | 0.5145 | 0.1195 | 0.061 | 2073.19 | 30.55 |
| ABS w/5%CF  | 02_ABS-CF_1 | 0.2 | 0.519  | 0.1253 | 0.065 | 1938.52 | 26.51 |
| ABS w/5%CF  | 02_ABS-CF_2 | 0.2 | 0.515  | 0.1245 | 0.064 | 1879.75 | 26.46 |
| ABS w/5%CF  | 02_ABS-CF_3 | 0.2 | 0.519  | 0.123  | 0.064 | 2003.65 | 28.79 |
| ABS w/5%CF  | 03_ABS-CF_1 | 0.3 | 0.525  | 0.1325 | 0.070 | 1792.51 | 23.33 |
| ABS w/5%CF  | 03_ABS-CF_2 | 0.3 | 0.5195 | 0.13   | 0.068 | 1622.56 | 23.93 |
| ABS w/5%CF  | 03_ABS-CF_3 | 0.3 | 0.519  | 0.135  | 0.070 | 1771.56 | 23.83 |
| ABS w/5%CF  | 04_ABS-CF_1 | 0.4 | 0.527  | 0.1335 | 0.070 | 1397.14 | 20.48 |
| ABS w/5%CF  | 04_ABS-CF_2 | 0.4 | 0.5245 | 0.135  | 0.071 | 1429.49 | 19.68 |
| ABS w/5%CF  | 04_ABS-CF_3 | 0.4 | 0.525  | 0.132  | 0.069 | 1502.05 | 21.67 |
| Pure ABS    | 01_ABS_1    | 0.1 | 0.5205 | 0.1305 | 0.068 | 1778.28 | 34.10 |
| Pure ABS    | 01_ABS_2    | 0.1 | 0.522  | 0.1345 | 0.070 | 1828.91 | 33.76 |
| Pure ABS    | 01_ABS_3    | 0.1 | 0.522  | 0.129  | 0.067 | 1870.49 | 34.50 |
| Pure ABS    | 02_ABS_1    | 0.2 | 0.534  | 0.1395 | 0.074 | 1664.03 | 29.92 |
| Pure ABS    | 02_ABS_2    | 0.2 | 0.5285 | 0.139  | 0.073 | 1661.66 | 29.60 |
| Pure ABS    | 02_ABS_3    | 0.2 | 0.531  | 0.146  | 0.078 | 1672.14 | 29.88 |
| Pure ABS    | 03_ABS_1    | 0.3 | 0.5301 | 0.153  | 0.081 | 1588.29 | 28.23 |
| Pure ABS    | 03_ABS_2    | 0.3 | 0.53   | 0.148  | 0.078 | 1650.16 | 29.01 |
| Pure ABS    | 03_ABS_3    | 0.3 | 0.53   | 0.151  | 0.080 | 1628.49 | 28.27 |
| Pure ABS    | 04_ABS_1    | 0.4 | 0.5325 | 0.148  | 0.079 | 1639.13 | 27.17 |
| Pure ABS    | 04_ABS_2    | 0.4 | 0.526  | 0.149  | 0.078 | 1615.24 | 28.01 |
| Pure ABS    | 04_ABS_3    | 0.4 | 0.5295 | 0.151  | 0.080 | 1659.40 | 26.78 |

**Table S3.** Average fracture toughness values obtained for each material and layer height.

| Material     | Layer Height (mm) | Fracture Toughness (MPa√m) |
|--------------|-------------------|----------------------------|
| ABS w/CNT    | 0.2               | 2.16                       |
| ABS w/CNT    | 0.3               | 1.80                       |
| ABS w/CNT    | 0.4               | 1.69                       |
| Lab-made ABS | 0.1               | 1.75                       |
| Premium ABS  | 0.1               | 2.70                       |
| Premium ABS  | 0.2               | 1.90                       |
| Premium ABS  | 0.3               | 1.78                       |
| Premium ABS  | 0.4               | 1.73                       |
| ABS w/5%CF   | 0.1               | 1.55                       |
| ABS w/5%CF   | 0.2               | 1.71                       |
| ABS w/5%CF   | 0.3               | 1.60                       |
| ABS w/5%CF   | 0.4               | 1.44                       |
| Pure ABS     | 0.1               | 2.21                       |
| Pure ABS     | 0.2               | 2.01                       |
| Pure ABS     | 0.3               | 2.07                       |

Pure ABS

0.4

2.06

---
